# Supplementary material for: Potential formation of mutagenicity by low pressure-UV/H2O2during the treatment of nitrate-rich source waters
Source: Royal Society of Chemistry journal article supplement (doi:10.1039/c7ew00389g), 2018-01-01
Supplement: c7ew00389g1.pdf [file c7ew00389g1.pdf]

1

## Supplementary Materials

2 **Authors:** Sofia Semitsoglou-Tsiapou, Michael R. Templeton, Nigel J.D. Graham, Suyash Mandal,

3 Lucía Hernández Leal, Joop C. Kruithof

4

5 **Title:** Potential formation of mutagenicity by low pressure-UV/H<sub>2</sub>O<sub>2</sub> during the treatment of

6 nitrate-rich source waters

7 **Figures**

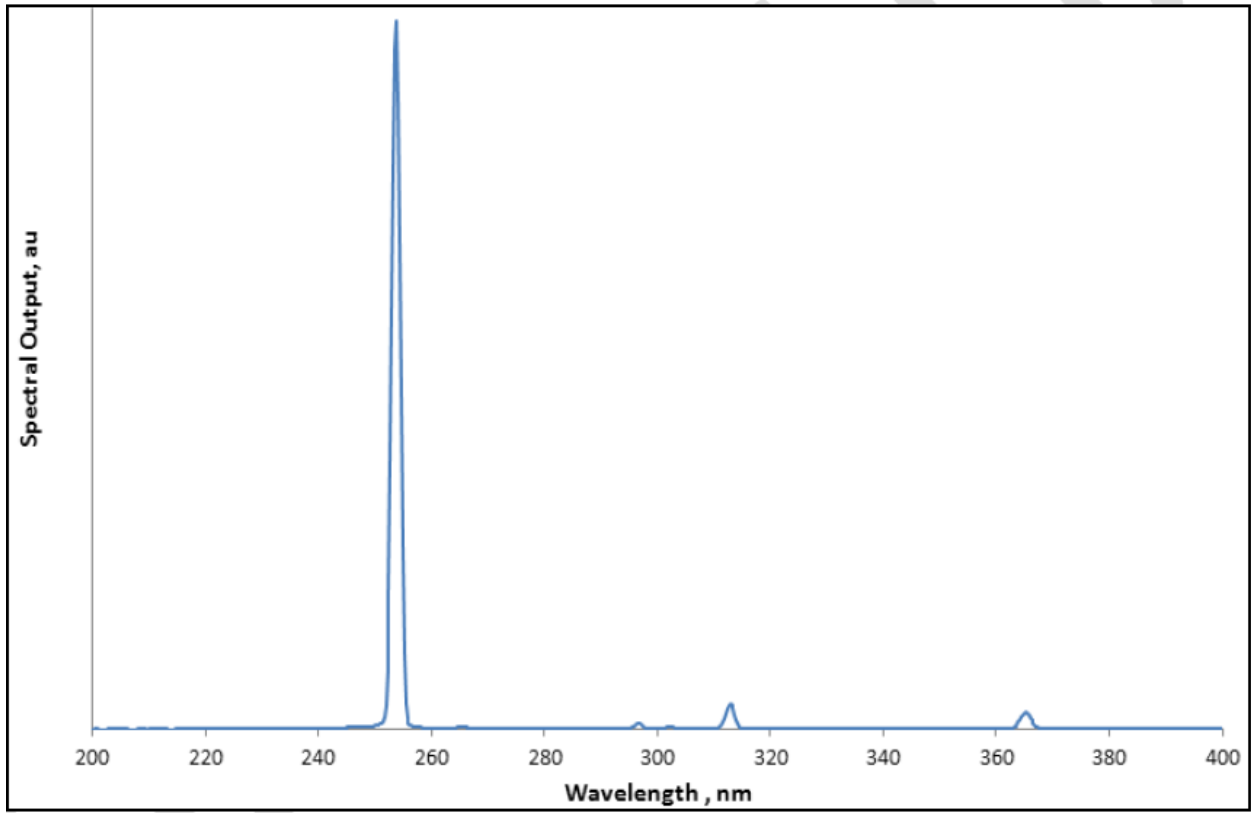

8

9 **Figure S.1.** Emission spectrum of the Low Pressure lamp used in the UV range (200-400 nm).

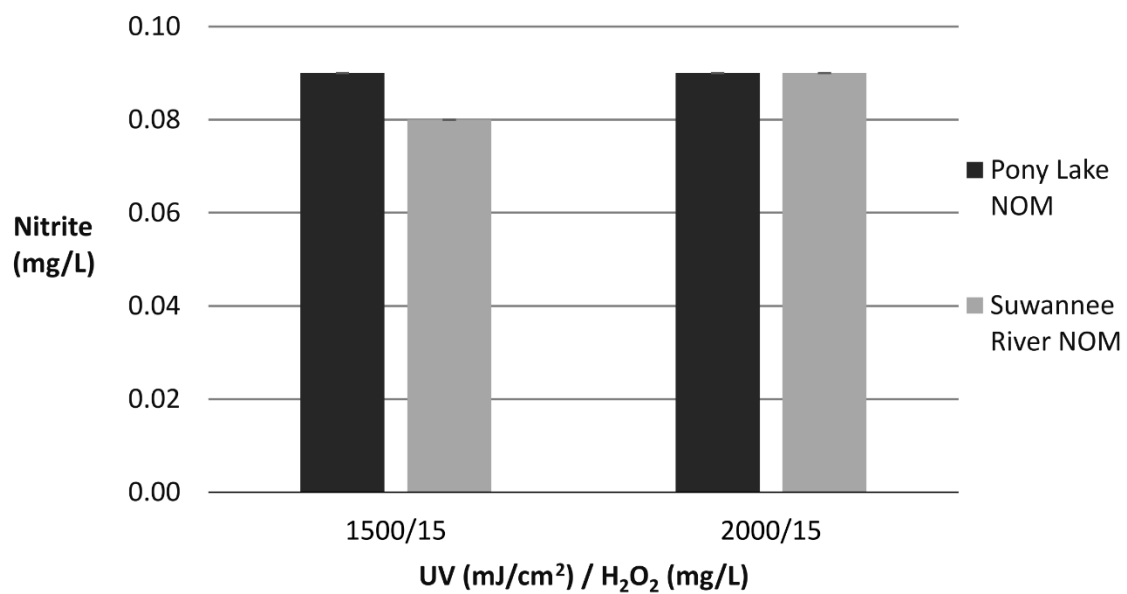

10

11 **Figure S.2.** Nitrite concentrations produced by the LP-UV/H<sub>2</sub>O<sub>2</sub> treatment of NOM solutions (4  
 12 mg/L) in the presence of nitrate (50 mg/L). The detection limit was 0.05 mg NO<sub>2</sub><sup>-</sup> /L.

13 **Tables**

14 **Table S.1.** Number of positive wells in each condition and replicate and calculated values for mean, standard deviation (SD) and  
 15 number-fold inductions compared to solvent control and baseline. Statistically significant different values ( $p < 0.05$ ) and number-fold  
 16 inductions  $> 3$  for number-fold over solvent and  $> 2$  for number-fold over baseline are marked in red. (S: Synthetic water samples, R:  
 17 raw water samples from the drinking water treatment plant)

| sample    | plate 1 |       |       | plate 2 |       |       | plate 3 |       |       | mean #<br>positive<br>wells | SD   | baseline<br>value | T test       | fold<br>solvent | fold<br>baseline | % pos<br>wells |
|-----------|---------|-------|-------|---------|-------|-------|---------|-------|-------|-----------------------------|------|-------------------|--------------|-----------------|------------------|----------------|
|           | rep 1   | rep 2 | rep 3 | rep 1   | rep 2 | rep 3 | rep 1   | rep 2 | rep 3 |                             |      |                   |              |                 |                  |                |
| solvent   | 6       | 8     | 8     | 5       | 8     | 7     | 3       | 7     | 4     | <b>6.22</b>                 | 1.86 | <b>8.08</b>       |              |                 |                  | 12.96          |
| method    | 7       | 12    | 8     | 4       | 4     | 4     | 8       | 9     | 4     | <b>6.67</b>                 | 2.87 | <b>9.54</b>       | 0.351        | 1.07            | 0.83             | 13.89          |
| pos       | 46      | 46    | 47    | 46      | 47    | 48    | 48      | 47    | 47    | <b>46.89</b>                | 0.78 |                   | <b>0.000</b> | <b>7.54</b>     | <b>5.80</b>      | 97.69          |
| S-samples |         |       |       |         |       |       |         |       |       |                             |      |                   |              |                 |                  |                |
| 16D018    |         |       |       | 6       | 7     | 3     |         |       |       | <b>5.33</b>                 | 2.08 |                   | 0.250        | 0.86            | 0.66             | 11.11          |
| 16D019    |         |       |       | 10      | 10    | 4     |         |       |       | <b>8.00</b>                 | 3.46 |                   | 0.134        | 1.29            | 0.99             | 16.67          |
| 16D020    |         |       |       | 5       | 1     | 4     |         |       |       | <b>3.33</b>                 | 2.08 |                   | <b>0.023</b> | 0.54            | 0.41             | 6.94           |
| 16D021    |         |       |       | 10      | 12    | 7     |         |       |       | <b>9.67</b>                 | 2.52 |                   | <b>0.014</b> | 1.55            | 1.20             | 20.14          |
| 16D022    |         |       |       |         |       |       | 7       | 9     | 4     | <b>6.67</b>                 | 2.52 |                   | 0.373        | 1.07            | 0.83             | 13.89          |
| 16D023    |         |       |       |         |       |       | 7       | 2     | 11    | <b>6.67</b>                 | 4.51 |                   | 0.402        | 1.07            | 0.83             | 13.89          |
| 16D024    |         |       |       |         |       |       | 10      | 10    | 5     | <b>8.33</b>                 | 2.89 |                   | 0.082        | 1.34            | 1.03             | 17.36          |
| 16D025    |         |       |       |         |       |       | 5       | 10    | 3     | <b>6.00</b>                 | 3.61 |                   | 0.444        | 0.96            | 0.74             | 12.50          |
| R-samples |         |       |       |         |       |       |         |       |       |                             |      |                   |              |                 |                  |                |
| 16D026    | 13      | 10    | 12    |         |       |       |         |       |       | <b>11.67</b>                | 1.53 |                   | 0.001        | 1.88            | 1.44             | 24.31          |
| 16D027    | 7       | 10    | 9     |         |       |       |         |       |       | <b>8.67</b>                 | 1.53 |                   | <b>0.034</b> | 1.39            | 1.07             | 18.06          |
| 16D028    | 6       | 8     | 9     |         |       |       |         |       |       | <b>7.67</b>                 | 1.53 |                   | 0.128        | 1.23            | 0.95             | 15.97          |
| 16D029    | 10      | 13    | 9     |         |       |       |         |       |       | <b>10.67</b>                | 2.08 |                   | <b>0.003</b> | 1.71            | 1.32             | 22.22          |
| 16D030    | 7       | 2     | 3     |         |       |       |         |       |       | <b>4.00</b>                 | 2.65 |                   | 0.067        | 0.64            | 0.50             | 8.33           |
| 16D031    |         |       |       |         |       |       | 3       | 4     | 5     | <b>4.00</b>                 | 1.00 |                   | <b>0.041</b> | 0.64            | 0.50             | 8.33           |
| 16D032    |         |       |       | 8       | 11    | 7     |         |       |       | <b>8.67</b>                 | 2.08 |                   | <b>0.041</b> | 1.39            | 1.07             | 18.06          |

18
